# Supplementary material for: Probe-based confocal laser endomicroscopy for in vivo evaluation of the tumor vasculature in gastric and rectal carcinomas
Source: PubMed Central journal article supplement (PMC5575283; doi:10.1038/s41598-017-10963-1), 2017-08-29
Supplement: 41598_2017_10963_MOESM1_ESM.pdf [file 41598_2017_10963_MOESM1_ESM.pdf]

## **Supplementary information**

### **Probe-based confocal laser endomicroscopy for in vivo evaluation of the tumor vasculature in gastric and rectal carcinomas.**

Paola Spessotto, Mara Fornasarig, Eliana Pivetta, Stefania Maiero, Raffaella Magris, Maurizio Mongiat, Vincenzo Canzonieri, Paolo De Paoli, Antonino De Paoli, Angela Buonadonna, Diego Serraino, Chiara Panato, Claudio Belluco, Renato Cannizzaro

**Table S1.** Clinic-pathological characteristics of patients.

| <b>GASTRIC</b>                 |           |          | <b>RECTAL</b>                  |           |          |
|--------------------------------|-----------|----------|--------------------------------|-----------|----------|
|                                | <b>N</b>  | <b>%</b> |                                | <b>N</b>  | <b>%</b> |
| All cases                      | 35        | 100      | All cases                      | 91        | 100      |
| Revaluated post CRT            | 11        | 31       | Revaluated post CRT            | 47        | 52       |
| Male                           | 21        | 60       | Male                           | 65        | 71.4     |
| Mean Age                       | 59(48-71) |          | Mean Age                       | 64(39-83) |          |
| Female                         | 14        | 40       | Female                         | 26        | 28.6     |
| Mean Age                       | 60(44-68) |          | Mean age                       | 64(37-78) |          |
| <b>Histologic type</b>         |           |          | <b>Pre CRT- clinical stage</b> |           |          |
| Diffuse                        | 15        | 42.8     | T2/T3N0                        | 38        | 41.8     |
| Intestinal                     | 20        | 57.2     | TxN+                           | 37        | 40.7     |
| <b>Tumor site</b>              |           |          |                                |           |          |
| Fundus                         | 6         | 17.1     |                                |           |          |
| Corpus                         | 23        | 65.7     |                                |           |          |
| Antrum                         | 6         | 17.2     |                                |           |          |
| <b>Pre CRT- clinical stage</b> |           |          |                                |           |          |
| T2/T3N0                        | 14        | 40       |                                |           |          |
| TxN+                           | 21        | 60       |                                |           |          |

CRT = chemio/radio therapy

**Video S1.** Representative sequences of defective flow in a rectal cancer patient with an angiogenic score 4.

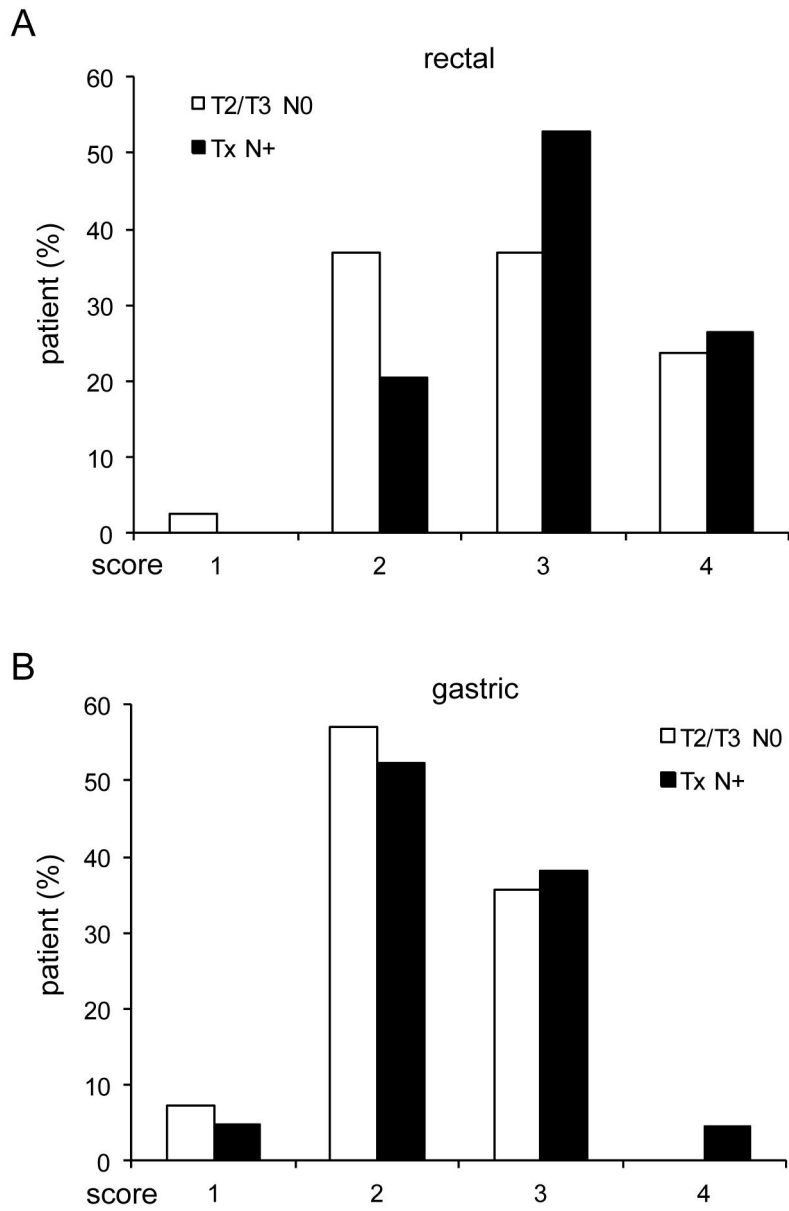

**Fig. S1.** Graphs showing the association between angiogenic score and tumor staging in rectal (A) and gastric (B). Tumors were divided in two groups (T2/T3N0 and TxN+) according to the presence of lymph node infiltration as assessed by ultrasonography during standard endoscopy.

**Table S2.** Percentage of gastric cancer patients displaying the morphological and functional parameters taken into account to generate the angiogenic score assessed before and after therapy.

|                         | <b>Gastric (N=11)</b> |                   | McNemar             |
|-------------------------|-----------------------|-------------------|---------------------|
|                         | First pCLE N (%)      | Second pCLE N (%) |                     |
| <b>Leakage</b>          |                       |                   |                     |
| Yes                     | 10 (90.9)             | 11 (100.0)        |                     |
| No                      | 1 (9.1)               | 0 (0.0)           |                     |
| <b>Tortuous vessels</b> |                       |                   |                     |
| Yes                     | 9 (81.8)              | 5 (45.5)          | <i>p-value=0.10</i> |
| No                      | 2 (18.2)              | 6 (54.5)          |                     |
| <b>Large vessels</b>    |                       |                   |                     |
| Yes                     | 9 (81.8)              | 8 (72.7)          | <i>p-value=0.65</i> |
| No                      | 2 (18.2)              | 3 (27.3)          |                     |
| <b>Defective flow</b>   |                       |                   |                     |
| Yes                     | 0 (0.0)               | 0 (0.0)           |                     |
| No                      | 11 (100.0)            | 11 (100.0)        |                     |
